# Supplementary material for: Breast cancer proteomics reveals correlation between estrogen receptor status and differential phosphorylation of PGRMC1
Source: Springer Nature journal article supplement (doi:10.1186/bcr2155), 2008-10-15
Supplement: Additional file 1 [file bcr2155-s1.pdf]

## Breast cancer proteomics reveals correlation between Estrogen Receptor status and differential phosphorylation of PGRMC1

Hans Neubauer, Susan E Clare, Wojciech Wozny, Gerhard P Schwall, Slobodan Poznanovic, Werner Stegmann, Ulrich Vogel, Karl Sotlar, Diethelm Wallwiener, Raffael Kurek, Tanja Fehm and Michael A Cahill

### Additional data file 1

#### Supplementary Discussion

##### *Validation of the differential abundance profile*

We observed markedly elevated levels of keratins 19, 18 and 8 in ER $\alpha$ -pos tumors, relative to ER $\alpha$ -neg tumors. Most ER $\alpha$ -pos cancers exhibit a phenotype similar to luminal epithelial cells of the milk ducts. Keratins 8 and 18 are characteristic of most secretory cells, and keratins 9 and 19 are present in ductal epithelial cells [46-48], while Cytokeratin 5 and Smooth Muscle Actin are characteristic of ER $\alpha$ -neg myoepithelial basal cells [49]. Our results show that particularly Cytokeratin 8, Cathepsin B, HSP27, and Ferritin Light Chain were less abundant in ER $\alpha$ -neg tumors than ER $\alpha$ -pos tumors, while Vimentin, Cyclophin A, Transferrin, Carbonic Anhydrase, and PGRMC1 as well as Apolipoprotein A1 and Albumin were more abundant in ER $\alpha$ -neg tumors, in accord with the reported wound response signature [26-29].

Fan et al. identified a high concordance among gene expression-based predictors for breast cancer. Therein, four significant gene expression models were compared. The groups with a poor outcome were those with a poor van't Veer 70-gene profile, an activated wound response, a high recurrence score, and the basal-like, luminal B, and Her2+ and ER $\alpha$ -neg intrinsic subtypes. These data suggest that if a tumor is classified as basal-like, Her2+ and ER $\alpha$ -negative, or luminal B, then it is more likely to reside in the poor-prognosis groups of the 70-gene, wound-response, and recurrence score models [50]. Our differential abundance proteomics data are also compatible with those results.

Notably, several hemoglobin spots were all slightly more abundant in the ER $\alpha$ -pos tumor pool with marginal significance ( $p > 0.05$ ; data not shown); their multiplicity suggesting that in addition to elevated lymphocyte levels [24], ER $\alpha$ -neg tumors may also have a lower density of blood vessels. Vascular Endothelial Growth Factor (VEGF) is a key mediator of tumor angiogenesis, including neovascularization in human breast cancer [51]. Garvin et al. suggest the operation of an estrogen-driven angiogenic switch, explained by the inhibition of soluble VEGFR-1 and stimulation of VEGF and VEGFR-2 tipping the angiogenic scale to favor angiogenesis, and possibly contributing to breast carcinoma progression [52]. Results obtained in a rodent experimental stroke model suggest that estrogen acting through its alpha receptor increases the expression of angiopoietin-1 mRNA and enhances capillary density in brain under basal conditions [53].

The most highly differential abundant protein in ER $\alpha$ -neg tumors relative to ER $\alpha$ -pos tumors in our study was Fibrinogen Gamma A Chain, followed by Fibrin. Fibrinogen is proteolytically cleaved under the influence of platelets to produce a fibrin clot during the process of blood coagulation after wounding. Cancer-related fibrin deposition and fibrinolysis characterizes many solid tumors, with cancer cells supplying many of the functions supplied by platelets in normal blood clotting [54]. The deposition of fibrinogen without subsequent conversion to fibrin in the tumor stroma is reportedly a hallmark of breast carcinoma [16].

Both fibrin and fibrin degradation products have been shown to promote angiogenesis, consistent with the hypothesis that fibrin-rich extracellular matrices may promote tumor stroma formation by mechanisms that are comparable with wound repair [55]. Additionally there is also substantial experimental evidence pointing to a role for fibrin(ogen) in tumor dissemination and metastasis [56]. The biology associated with variability in extracellular matrix of the different tumor ER $\alpha$ -pos and ER $\alpha$ -neg types revealed here deserves further examination.

We also detected that XTP3-Transactivated Protein A is significantly more abundant in ER $\alpha$ -neg tumors. This protein is a member of a recently identified superfamily of all-alpha NTP pyrophosphohydrolases, and is known to be overexpressed in embryonic and cancer cells [57].

### ***Candidate PGRMC1 interacting proteins***

It is reasonable to speculate that differences in the phosphorylation status of PGRMC1 can affect the proteins with which it interacts, and thereby affect cellular biology. The cancer relevance of PGRMC1 interactions with the proteins Insig-1 and SCAP which regulate the mevalonate pathway have been discussed above and reviewed [20]. Interaction of PGRMC1 with the protein PAIRBP1 may be involved in mediating an anti-apoptotic action of progesterone [58, 59]. Interestingly, PAIRBP1/CGI-55 was shown to interact not only with a cAMP-responsive element of the mRNA of a serpin inhibitor of extracellular proteases (for review: [20]), but also with the histone deacetylase CHD3/Mi-2 [60]. This in turn is a component of the Nucleosome Remodeling and Deacetylase (NuRD) complex that is involved in chromatin remodeling that plays a prominent role in orchestrating events in breast cancer progression and metastasis involving epigenetic locus control by steroid receptors including the ER $\alpha$  in breast cancer [61, 62].

Concerning VEGF induction, vascularization, and possible PGRMC1 interaction partners, we note that migration of the vascular growth cone during angiogenesis is directed by the Netrin/DCC system [63]. The nematode homologs of these proteins are Unc-6/Unc-40 respectively. Netrin/Unc-6 is a lamin-like extracellular ligand for the DCC/Unc-40 receptor. Vem-1, the nematode homolog of PGRMC1, forms a protein complex with Unc-40 and the two genes were functionally linked by genetics [64]. Therefore PGRMC1 presumably interacts with the mammalian Unc-40 homologs Neogenin and/or DCC. The Netrin system is highly relevant to cancer because DCC and Neogenin are dependence receptors which have been argued to induce Caspase-directed apoptosis in the absence of Netrin [20, 65]. Intriguingly, a subpopulation of DCC resides in intracellular vesicles which can be relocalized to the plasma membrane [66], and PGRMC1 possesses a number of tyrosine-based (ITAM/YXX $\Phi$ ) motifs which implicate a role in membrane trafficking [20, 64]. It is conceivable that PGRMC1 regulates the cellular location of DCC and/or Neogenin, as suggested [64], in a phosphorylation- and/or ligand-dependent dependent fashion.

Netrin and Neogenin/DCC are present in transmembrane extracellular protein complexes containing integrins and cadherins that mediate cell-cell contacts and generate cytoplasmic contact growth inhibition and survival signals [67, 68]. The Netrin system also is involved in the directed migration and tissue invasion of mammary terminal end buds, which are proliferative substructures which constitute the invading edge of developing mammary duct glands [69]. The latter example involves related cells to those that cause breast cancer, and is potentially highly relevant to our present study result. Indeed Neogenin promotes Endothelial-Mesoderm Transition [70], which correlates with local tumor invasion and metastasis [71]. Future research should address what role if any these proposed interactions of PGRMC1 with the candidate interaction partners discussed here may play in breast cancer.

## Supplementary Tables

| Protein Name          | Number of Spots | Experimental |        | Genbank AccNo | PMF Score   |
|-----------------------|-----------------|--------------|--------|---------------|-------------|
|                       |                 | PI           | MW     |               |             |
| Albumin               | 19 spots        | 5.8          | 73000  | gi 23307793   | 87          |
|                       |                 | 5.3          | 71000  | gi 6013427    | 54          |
|                       |                 | 5.3          | 67000  |               | 72          |
|                       |                 | 5.3          | 66000  |               | 58          |
|                       |                 | 5.4          | 83000  |               | 75          |
|                       |                 | 5.4          | 72000  |               | 93          |
|                       |                 | 5.4          | 72000  |               | 96          |
|                       |                 | 5.4          | 62000  |               | 85          |
|                       |                 | 5.4          | 60000  |               | 70          |
|                       |                 | 5.5          | 72000  |               | 112         |
|                       |                 | 5.5          | 71000  |               | 158         |
|                       |                 | 5.5          | 70000  |               | 86          |
|                       |                 | 5.6          | 71000  |               | 136         |
|                       |                 | 5.6          | 71000  |               | 144         |
|                       |                 | 5.6          | 50000  |               | 63          |
|                       |                 | 5.7          | 104000 |               | 94          |
|                       |                 | 5.7          | 71000  |               | 88          |
|                       |                 | 5.7          | 71000  |               | 90          |
|                       |                 | 5.7          | 71000  |               | 128         |
| ATP synthase          | 2 spots         | 6.7          | 55000  |               | gi 24660110 |
|                       |                 | 6.9          | 57000  | 169           |             |
| Carbonic Anhydrase II | 2 Spots         | 6.5          | 27000  | gi 1633065    | 78          |
|                       |                 | 6.7          | 26000  | gi 999651     | 74          |
| Cyclophilin A         | 3 Spots         | 6.8          | 16000  | gi 1633054    | 87          |
|                       |                 | 7.4          | 15000  |               | 81          |
|                       |                 | 7.0          | 16000  |               | 85          |
| Fibrinogen beta       | 5 spots         | 6.1          | 59000  | gi 399492     | 79          |
|                       |                 | 6.1          | 57000  |               | 85          |
|                       |                 | 6.8          | 55000  |               | 66          |
|                       |                 | 7.1          | 57000  |               | 88          |
|                       |                 | 5.6          | 40000  | gi 2781208    | 70          |
| HSP27                 | 2 spots         | 5.4          | 26000  | gi 662841     | 123         |
|                       |                 | 5.5          | 26000  | 125           |             |
| Keratin 7             | 3 spots         | 5.2          | 55000  | gi 30089956   | 97          |
|                       |                 | 5.2          | 54000  |               | 112         |
|                       |                 | 5.3          | 56000  |               | 273         |
| Keratin 8             | 4 spots         | 5.3          | 56000  | gi 39645331   | 154         |
|                       |                 | 5.1          | 49000  | gi 4504919    | 102         |
|                       |                 | 5.2          | 49000  | 215           |             |
|                       |                 | 5.4          | 55000  | 419           |             |
| Keratin 9             | 4 spots         | 5.1          | 67000  | gi 435476     | 217         |
|                       |                 | 5.1          | 66000  | 141           |             |
|                       |                 | 5.1          | 16000  | 132           |             |
|                       |                 | 5.1          | 12000  | gi 4557705    | 72          |
| Keratin 19            | 4 spots         | 5.0          | 43000  | gi 34783124   | 407         |
|                       |                 | 5.0          | 42000  |               | 395         |
|                       |                 | 5.0          | 42000  |               | 424         |
|                       |                 | 4.9          | 41000  |               | 204         |
| Alpha 1 antitrypsin   | 14 spots        | 4.5          | 60000  | gi 1942629    | 126         |
|                       |                 | 4.8          | 62000  |               | 103         |
|                       |                 | 4.8          | 54000  |               | 97          |
|                       |                 | 4.8          | 52000  |               | 71          |
|                       |                 | 4.8          | 51000  |               | 93          |
|                       |                 | 4.8          | 50000  |               | 80          |
|                       |                 | 4.9          | 63000  |               | 186         |
|                       |                 | 4.9          | 50000  |               | 97          |
|                       |                 | 5.0          | 61000  |               | 232         |

| Protein Name                        | Number of Spots | Experimental |       | Genbank AccNo | PMF Score |
|-------------------------------------|-----------------|--------------|-------|---------------|-----------|
|                                     |                 | PI           | MW    |               |           |
|                                     |                 | 5.0          | 60000 |               | 254       |
|                                     |                 | 5.0          | 49000 |               | 149       |
|                                     |                 | 5.0          | 61000 |               | 130       |
|                                     |                 | 5.1          | 60000 |               | 133       |
|                                     |                 | 4.9          | 50000 |               | 66        |
| Translation elongation factor delta | 2 spots         | 4.9          | 35000 | gi25453472    | 93        |
|                                     |                 | 5.0          | 35000 |               | 70        |
| PGRMC1                              | 3 spots         | 4.6          | 22000 | gi5729875     | 95        |
|                                     |                 | 4.55         | 22000 |               | 110       |
|                                     |                 | 4.5          | 22000 |               | 107       |
| Transferrin receptor                | 2 spots         | 6.0          | 80000 | gi37747855    | 99        |
|                                     |                 | 6.2          | 81000 |               | gi4557871 |
| Transgelin                          | 2 spots         | 7.8          | 22000 | gi4507359     | 95        |
|                                     |                 | 8.5          | 21000 |               | 137       |
| Vimentin                            | 3 spots         | 4.8          | 47000 | gi4507895     | 336       |
|                                     |                 | 5.0          | 56000 |               | 531       |
|                                     |                 | 4.9          | 45000 |               | 150       |

### Supplementary Table S1.

Protein spots that contained multiple identifications of individual proteins as gene products. The protein name and number of spots are indicated in the column headings. Approximate estimates for the experimentally observed isoelectric point (PI) and molecular weight (MW) are given for each spot, as are Genbank accession numbers and PMF scores, the nomenclature conventions for which follow Figure 3.

| Experimental variable designation | Description | Tumor status                                                 | Lymph node status                                                         | Grade | ER status | PR status | Her2/neu status | Age of patient |    |    |
|-----------------------------------|-------------|--------------------------------------------------------------|---------------------------------------------------------------------------|-------|-----------|-----------|-----------------|----------------|----|----|
| Figure 8 B                        | i-iii       | invasive ductulo-lobular adenocarcinoma                      | 2                                                                         | 0     | 2         | 6         | 9               | 1              | 52 |    |
|                                   | iv          | invasive lobular adenocarcinoma                              | X                                                                         | 0     | 2-3       | 8         | 2               | 0              | 75 |    |
|                                   | v           | invasive lobular adenocarcinoma                              | 1                                                                         | 1     | 2         | 0         | 6               | 0              | 62 |    |
|                                   | vi          | invasive ductulo-lobular adenocarcinoma                      | 4                                                                         | X     | 2         | 8         | 2               | 3              | 68 |    |
|                                   | vii         | invasive ductal adenocarcinoma                               | 2                                                                         | 1     | 2-3       | 0         | 0               | 3              | 69 |    |
|                                   | viii        | invasive ductal adenocarcinoma                               | 2                                                                         | 1     | 2         | 8         | 2               | 0              | 61 |    |
|                                   | ix          | invasive ductal adenocarcinoma with ductal in situ component | 1                                                                         | X     | 2-3       | 12        | 6               | 0              | 72 |    |
|                                   | x           | ductal in situ carcinoma                                     | X                                                                         | X     | X         | 12        | 0               | 3              | 59 |    |
|                                   | xi          | invasive ductal adenocarcinoma with ductal in situ component | 1                                                                         | 0     | 2         | 12        | 12              | 0              | 73 |    |
|                                   | xii         | invasive ductal adenocarcinoma                               | 1                                                                         | 2     | 2         | 0         | 0               | 0              | 59 |    |
|                                   | Figure 8 C  | i-vii                                                        | multifocal invasive ductulo-lobular adenocarcinoma with carcinoma in situ | 1     | x         | 2         | 12              | 12             | 1  | 40 |

### Supplementary Table S2.

Clinical patient data for the tumours in Figure 8B and 8C. Classifications are according to Table 1 in the main manuscript.
